# Supplementary material
Source: PubMed Central journal article supplement (PMC7286565)
Supplement: NIHMS1555366-supplement-Supplemental_Material.pdf [file NIHMS1555366-supplement-Supplemental_Material.pdf]

## SUPPLEMENTAL MATERIAL

### Additional methodology regarding the collection of data on modified Rankin Scores (mRS) at baseline

The baseline mRS for each patient was determined by trained study nurses using all information available from extensive medical record review. Definitions used by study nurses are consistent with the validated mRS score and are described in the Table below. Some examples of our consistency rules are as follows: if participants use a cane they are at least a 2, but if they need help with ADLs they are assigned a 3. If participants use a walker (without a person assist) they are typically classified as a 3, but if documentation shows that they need another person for ambulation, they may be a 4.

| <b>Score</b> | <b>Description</b>                                                                                                          |
|--------------|-----------------------------------------------------------------------------------------------------------------------------|
| 0            | No symptoms at all                                                                                                          |
| 1            | No significant disability despite symptoms; able to carry out all usual duties and activities                               |
| 2            | Slight disability; unable to carry out all previous activities, but able to look after own affairs without assistance       |
| 3            | Moderate disability; requiring some help, but able to walk without assistance                                               |
| 4            | Moderately severe disability; unable to walk without assistance and unable to attend to own bodily needs without assistance |
| 5            | Severe disability; bedridden, incontinent, and requiring constant nursing care and attention                                |
| 6            | Dead                                                                                                                        |
